# Supplementary material for: Contrast enhanced sonothrombolysis using streptokinase loaded phase change nano-droplets for potential treatment of deep venous thrombosis
Source: Royal Society of Chemistry journal article supplement (doi:10.1039/d2ra04467f), 2022-01-01
Supplement: d2ra04467f1.pdf [file d2ra04467f1.pdf]

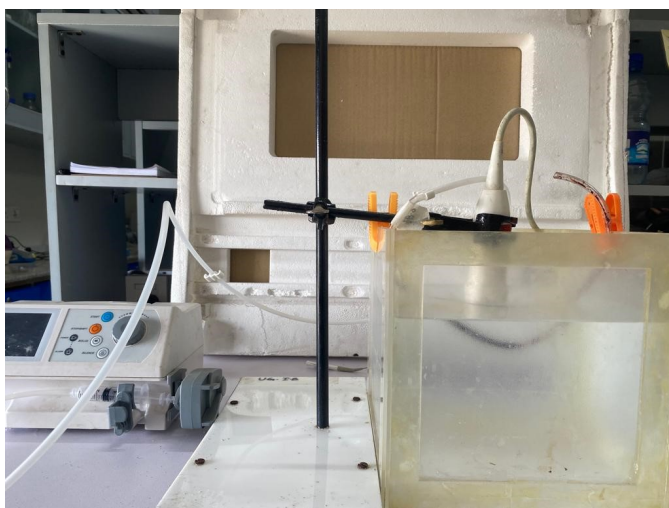

Supplementary Figure 1: Acoustic setup for sonothrombolysis.

Supplementary Table 1: Tukey's multiple comparisons (ANOVA) test on mean grey intensity vs MI

| Tukey's multiple comparisons test                               | Mean Diff. | 95.00% CI of diff. | Adjusted P-Value |
|-----------------------------------------------------------------|------------|--------------------|------------------|
| US + PCNDs (MI=0.3) vs. US + PCNDs (MI=0.6)                     | 5.939      | 3.730 to 8.148     | <0.0001          |
| US + PCNDs (MI=0.3) vs. US + SK loaded PCNDs (MI=0.3)           | 12.76      | 6.014 to 19.51     | 0.0011           |
| US + PCNDs (MI=0.3) vs. US + SK loaded PCNDs (MI=0.6)           | 16.42      | 7.171 to 25.67     | 0.0017           |
| US + PCNDs (MI=0.6) vs. US + SK loaded PCNDs (MI=0.3)           | 6.825      | 2.101 to 11.55     | 0.0066           |
| US + PCNDs (MI=0.6) vs. US + SK loaded PCNDs (MI=0.6)           | 10.48      | 3.150 to 17.82     | 0.0070           |
| US + SK loaded PCNDs (MI=0.3) vs. US + SK loaded PCNDs (MI=0.6) | 3.658      | 0.6786 to 6.638    | 0.0173           |

---

**Supplementary Table: 2** Tukey's multiple comparisons (ANOVA) test on mean grey intensity vs time

---

| <b>Tukey's multiple comparisons test</b> | <b>Mean Diff.</b> | <b>95.00% CI of diff.</b> | <b>Adjusted P-Value</b> |
|------------------------------------------|-------------------|---------------------------|-------------------------|
| US 15 MIN vs. US+SK 15 MIN               | 7.243             | 0.02459 to 14.46          | 0.0493                  |
| US 15 MIN vs. US+SK 30MIN                | 13.16             | -0.004023 to 26.33        | 0.0501                  |
| US 30 MIN vs. US+SK 15 MIN               | 5.205             | -0.1017 to 10.51          | 0.0539                  |
| US 30 MIN vs. US+SK 30MIN                | 11.12             | 0.3998 to 21.85           | 0.0433                  |
| US+ PCNDs 15 vs. US+ PCNDs 30            | 5.742             | -0.1027 to 11.59          | 0.0536                  |
| US+ PCNDs 15 vs. US+SK 30MIN             | 10.78             | 3.641 to 17.92            | 0.0088                  |

---

**Supplementary Table3:** Tukey's multiple comparisons (ANOVA) test on weight loss

---

| <b>Tukey's multiple comparisons test</b> | <b>Mean Diff.</b> | <b>95.00% CI of diff.</b> | <b>Adjusted P-Value</b> |
|------------------------------------------|-------------------|---------------------------|-------------------------|
| US vs. US+ PCNDs                         | -15.40            | -24.47 to -6.334          | 0.0079                  |
| US vs. US+SK                             | -29.80            | -44.33 to -15.27          | 0.0039                  |
| US vs. US+SK LOADED PCNDs                | -56.60            | -68.72 to -44.48          | 0.0002                  |
| US+ PCNDs vs. US+SK                      | -14.40            | -24.42 to -4.379          | 0.0145                  |
| US+ PCNDs vs. US+SK LOADED PCNDs         | -41.20            | -49.68 to -32.72          | 0.0002                  |
| US+SK vs. US+SK LOADED PCNDs             | -26.80            | -30.95 to -22.65          | <0.0001                 |
